# Supplementary material for: Regionalizing non-parametric precipitation amount models on different temporal scales
Source: Copernicus journal article supplement (doi:10.5194/hess-2016-458), 2016-10-17
Supplement: Supplementary file [file hess-2016-458-AC1-supplement.zip]

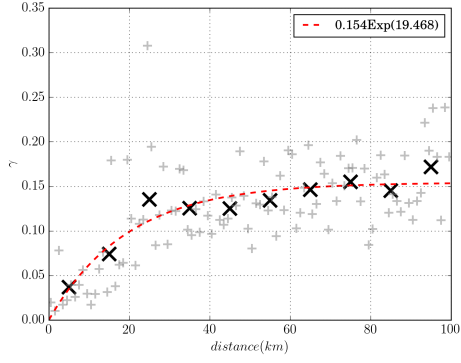

(a)  $QV_c$  of NP-SRT

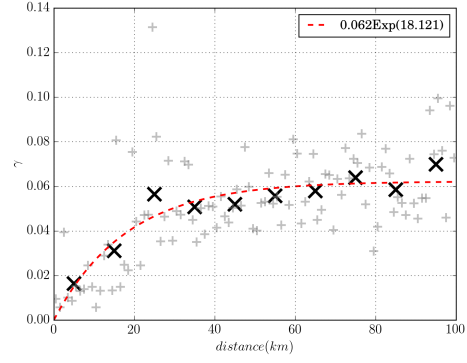

(b)  $QV_{th}$

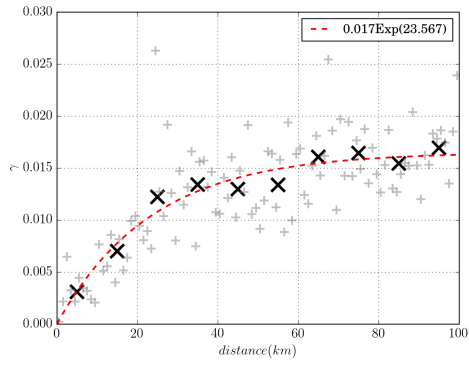

(c)  $\lambda_1$  of P-Mixed-Exp-MLM

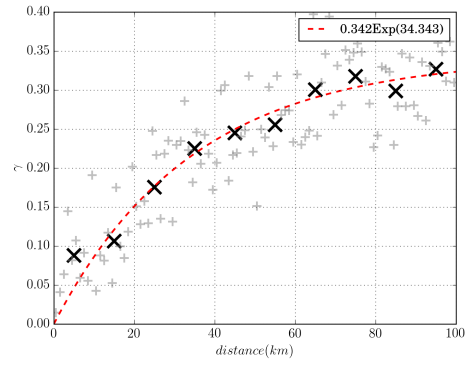

(d)  $\lambda_2$  of P-Mixed-Exp-MLM

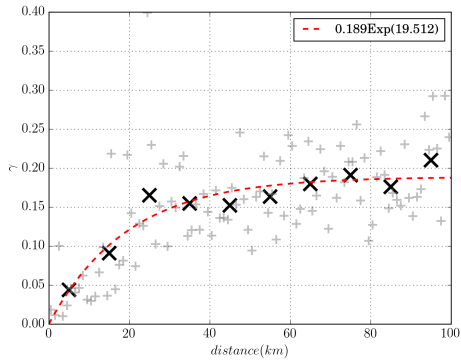

(e) mean of P-Weibull-MOM

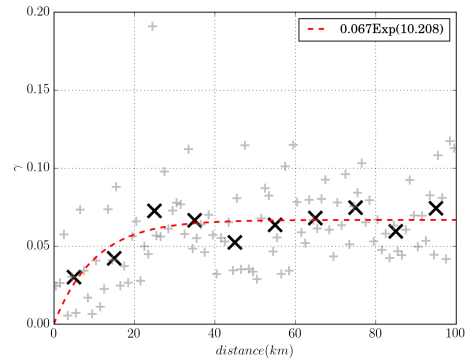

(f) standard deviation P-Weibull-MOM

Figure 1: Winter Calibration Sample 2, 1H

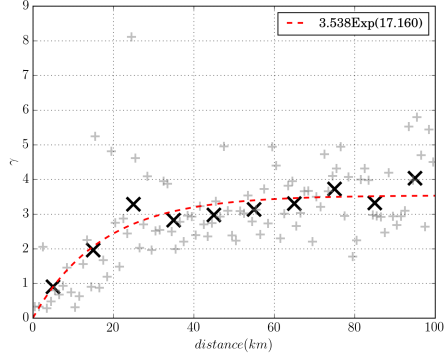

(a)  $QV_c$  of NP-SRT

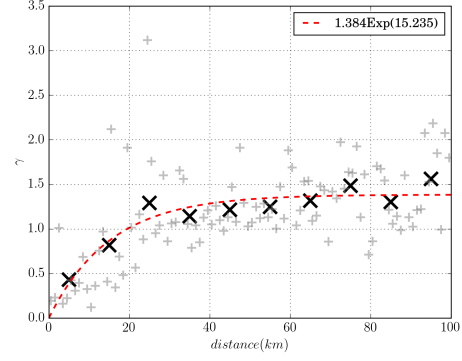

(b)  $QV_{th}$

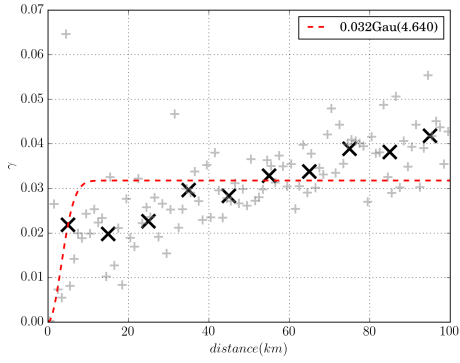

(c)  $\lambda_1$  of P-Mixed-Exp-MLM

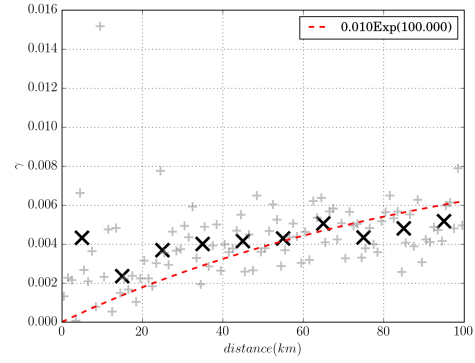

(d)  $\lambda_2$  of P-Mixed-Exp-MLM

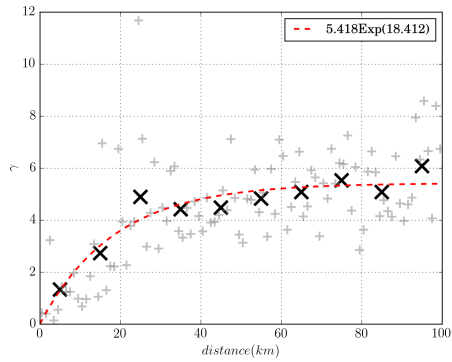

(e) mean of P-Weibull-MOM

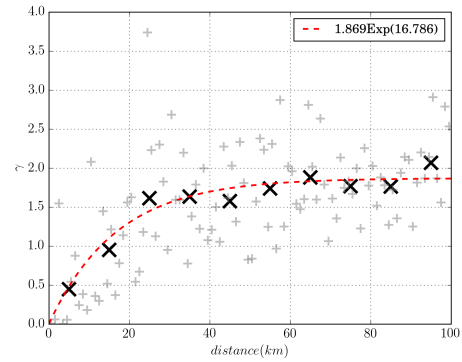

(f) standard deviation P-Weibull-MOM

Figure 2: Winter Calibration Sample 2, 12H

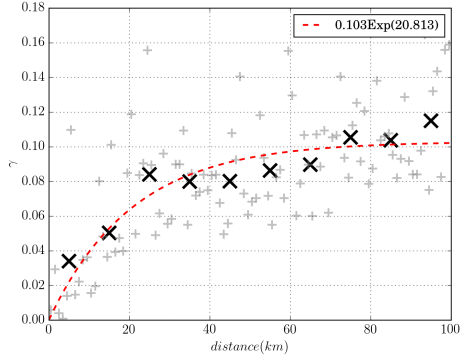

(a)  $QV_c$  of NP-SRT

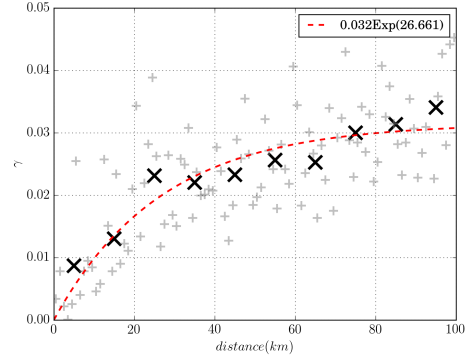

(b)  $QV_{th}$

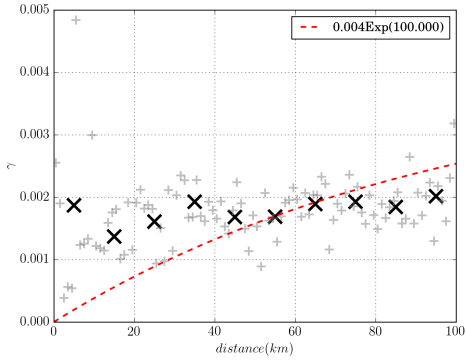

(c)  $\lambda_1$  of P-Mixed-Exp-MLM

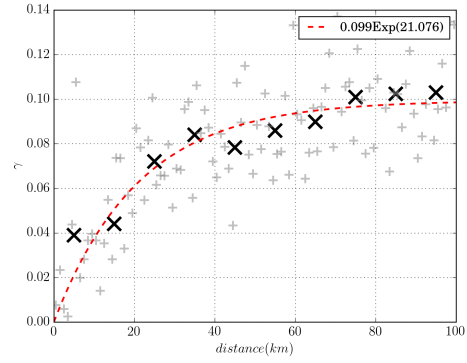

(d)  $\lambda_2$  of P-Mixed-Exp-MLM

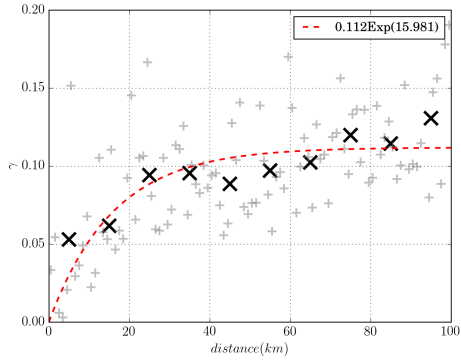

(e) mean of P-Weibull-MOM

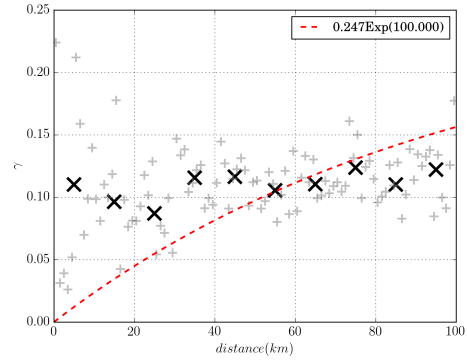

(f) standard deviation P-Weibull-MOM

Figure 3: Summer Calibration Sample 2, 1H

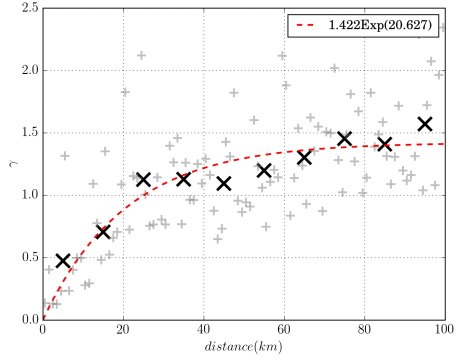

(a)  $QV_c$  of NP-SRT

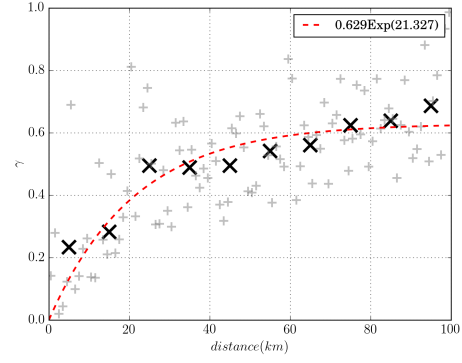

(b)  $QV_{th}$

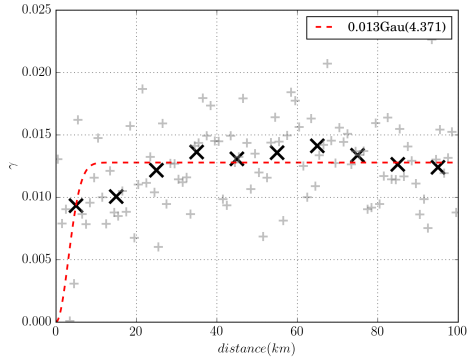

(c)  $\lambda_1$  of P-Mixed-Exp-MLM

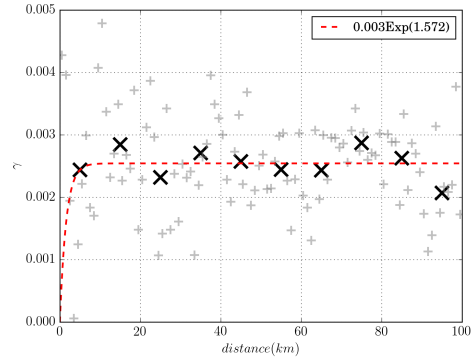

(d)  $\lambda_2$  of P-Mixed-Exp-MLM

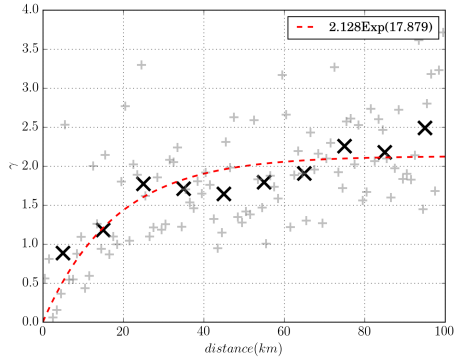

(e) mean of P-Weibull-MOM

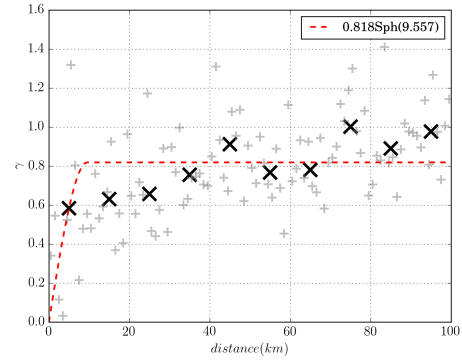

(f) standard deviation P-Weibull-MOM

Figure 4: Summer Calibration Sample 2, 12H
