# Supplementary material for: Regionalizing non-parametric precipitation amount models on different temporal scales
Source: Copernicus journal article supplement (doi:10.5194/hess-2016-458), 2016-10-17
Supplement: Supplementary file [file hess-2016-458-AC1-supplement.zip]

**Table 1.** Ranking numbers including only median and mean of the  $W^2$  criterion for point wise estimation. The bold numbers indicate the overall best model for each temporal resolution.

| Winter Season   |          |             |             |          |          |          |          |          |
|-----------------|----------|-------------|-------------|----------|----------|----------|----------|----------|
|                 | 1H       | 2H          | 3H          | 6H       | 12H      | 1D       | 5D       | M        |
| P-Weibull-MLM   | 10.66    | 6.56        | 4.51        | 3.22     | 2.91     | 3.6      | 3.44     | 12.92    |
| P-Gamma-MLM     | 18.62    | 12.18       | 8.3         | 4.96     | 3.93     | 5.02     | 4.15     | 4.24     |
| P-Exp-MLM       | 69.36    | 55.24       | 41.36       | 23.09    | 15.01    | 15.54    | 6.1      | 79.79    |
| P-Mixed-Exp-MLM | 4.5      | 3.62        | 3.35        | 3.16     | 2.83     | 3.11     | 6.26     | 79.79    |
| P-Weibull-MOM   | 83.08    | 37.95       | 22.41       | 9.71     | 6.47     | 6.72     | 3.82     | 3.11     |
| P-Gamma-MOM     | 184.3    | 89.57       | 51.98       | 20.95    | 11.06    | 11.54    | 4.39     | 2.82     |
| NP-SJ           | <b>2</b> | <b>2.03</b> | 2.04        | 2.08     | 2.09     | <b>2</b> | <b>2</b> | 2.34     |
| NP-SRT          | 2.1      | <b>2.03</b> | <b>2.01</b> | <b>2</b> | <b>2</b> | 2.11     | 2.09     | <b>2</b> |
| Summer Season   |          |             |             |          |          |          |          |          |
|                 | 1H       | 2H          | 3H          | 6H       | 12H      | 1D       | 5D       | M        |
| P-Weibull-MLM   | 14.06    | 6.9         | 4.82        | 3.5      | 3.03     | 3.2      | 3.32     | 14.47    |
| P-Gamma-MLM     | 34.39    | 17.4        | 10.24       | 5.48     | 3.67     | 3.98     | 4.17     | 3.39     |
| P-Exp-MLM       | 167.98   | 98.63       | 57.03       | 20.64    | 9.58     | 10.69    | 7.57     | 66.59    |
| P-Mixed-Exp-MLM | 7.26     | 3.93        | 3.31        | 2.69     | 2.72     | 2.71     | 7.94     | 66.59    |
| P-Weibull-MOM   | 87.44    | 33.65       | 17.77       | 7.34     | 4.77     | 4.56     | 3.46     | 3.05     |
| P-Gamma-MOM     | 261.5    | 103.38      | 48.5        | 15.53    | 7.41     | 7.19     | 4.12     | 3.43     |
| NP-SJ           | 2.15     | 2.19        | 2.14        | 2.2      | 2.14     | 2.05     | <b>2</b> | 2.21     |
| NP-SRT          | <b>2</b> | <b>2</b>    | <b>2</b>    | <b>2</b> | <b>2</b> | <b>2</b> | 2.07     | <b>2</b> |

**Table 2.** Ranking numbers including only median and mean of the  $L_d$  criterion for point wise estimation. The bold numbers indicate the overall best model for each temporal resolution.

| Winter Season   |             |          |          |          |          |          |             |             |
|-----------------|-------------|----------|----------|----------|----------|----------|-------------|-------------|
|                 | 1H          | 2H       | 3H       | 6H       | 12H      | 1D       | 5D          | M           |
| P-Weibull-MLM   | 12.08       | 6.47     | 6.31     | 3.93     | 2.55     | 4.78     | 3.82        | 18.58       |
| P-Gamma-MLM     | 22.34       | 14.04    | 15.48    | 10.21    | 4.66     | 8.21     | 6.24        | 614.81      |
| P-Exp-MLM       | 72.8        | 58.93    | 79.03    | 72.43    | 33.32    | 33.03    | 10.09       | 4664.4      |
| P-Mixed-Exp-MLM | 6.41        | <b>2</b> | <b>2</b> | <b>2</b> | <b>2</b> | <b>2</b> | 13.55       | 4666.72     |
| P-Weibull-MOM   | 12.03       | 10.14    | 13.04    | 11.91    | 6.6      | 7.33     | <b>2.08</b> | 8.29        |
| P-Gamma-MOM     | 27.42       | 23.39    | 28.18    | 23.07    | 10.65    | 13.09    | 2.42        | 241.03      |
| NP-SJ           | <b>2</b>    | 5.32     | 15.99    | 43.64    | 41.25    | 29.73    | 10.09       | 7.77        |
| NP-SRT          | <b>2</b>    | 5.43     | 16.45    | 42.3     | 38.37    | 31.9     | 10.41       | <b>5.37</b> |
| Summer Season   |             |          |          |          |          |          |             |             |
|                 | 1H          | 2H       | 3H       | 6H       | 12H      | 1D       | 5D          | M           |
| P-Weibull-MLM   | 14.89       | 6.66     | 7.3      | 5.31     | 3.2      | 3.11     | 5.31        | 12.53       |
| P-Gamma-MLM     | 31.66       | 18.26    | 21.71    | 12.9     | 5.4      | 4.7      | 9.7         | 417.99      |
| P-Exp-MLM       | 123.59      | 93.36    | 124.39   | 76.61    | 24.81    | 17.78    | 23.22       | 5488.53     |
| P-Mixed-Exp-MLM | 7.12        | <b>2</b> | <b>2</b> | <b>2</b> | <b>2</b> | <b>2</b> | 28.12       | 5488.53     |
| P-Weibull-MOM   | 11.53       | 8.16     | 11.09    | 9.88     | 5.65     | 3.98     | <b>2</b>    | <b>4.09</b> |
| P-Gamma-MOM     | 33.49       | 23.24    | 28.86    | 20.26    | 9.49     | 6.47     | 3.1         | 313.86      |
| NP-SJ           | <b>2.32</b> | 7.75     | 20.59    | 50.72    | 47.97    | 33.04    | 11.03       | 7.52        |
| NP-SRT          | <b>2</b>    | 6.44     | 18.08    | 39.91    | 41.51    | 30.63    | 11.98       | 5.7         |
