# Supplementary material for: Regionalizing non-parametric precipitation amount models on different temporal scales
Source: Copernicus journal article supplement (doi:10.5194/hess-2016-458), 2016-10-17
Supplement: Supplementary file [file hess-2016-458-AC1-supplement.zip]

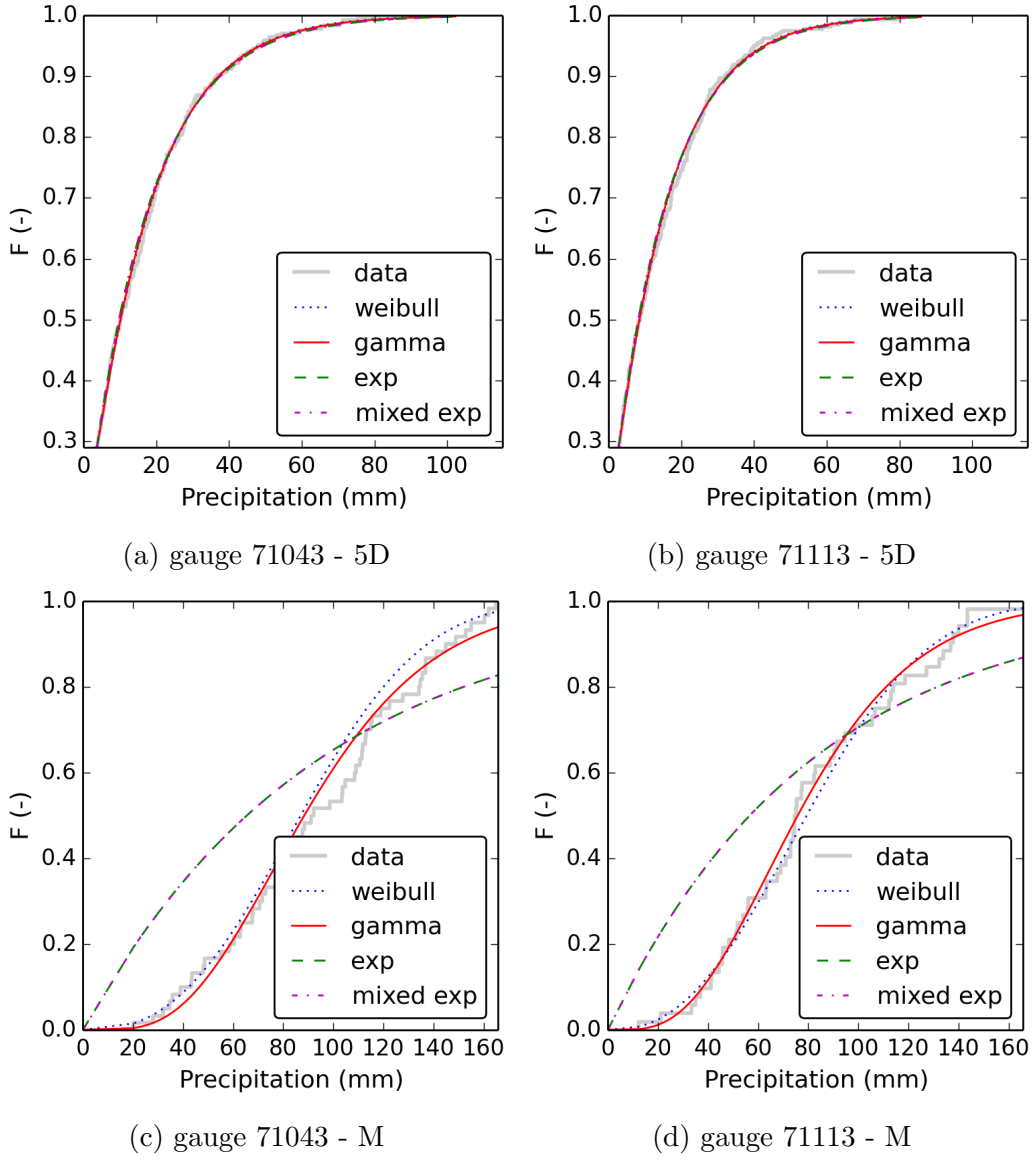

Figure 1: Fitting distributions using Maximum-Likelihood-Estimation for monthly (M) and 5-daily (5D) rainfall values of the summer season. Two exemplary gauges (with the ids 71043 and 71113) are chosen to illustrate the problem of fitting monthly distributions using exponential type distributions.
