# Supplementary material for: Regionalizing non-parametric precipitation amount models on different temporal scales
Source: Copernicus journal article supplement (doi:10.5194/hess-2016-458), 2016-10-17

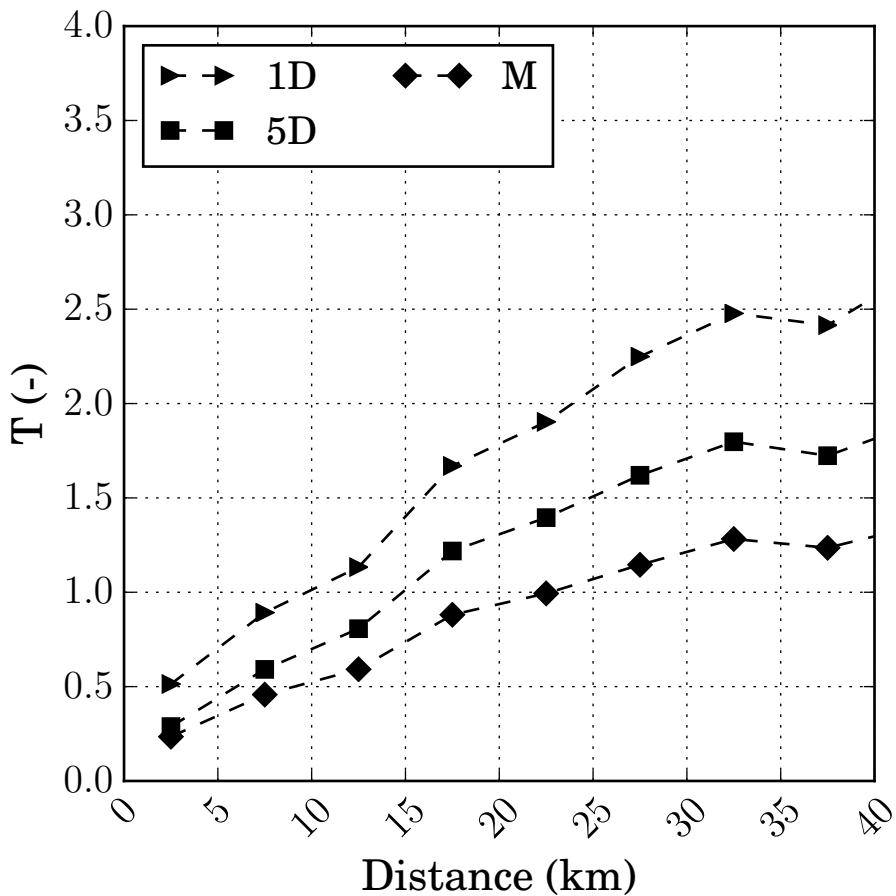

Supplement: Supplementary file [file hess-2016-458-AC1-supplement.zip]
